# Supplementary material
Source: bioRxiv or medRxiv preprint supplement (http://www.biorxiv.org/highwire/filestream/18322/field_highwire_adjunct_files/0/036822-1.pdf)

# Supplementary Figure 1

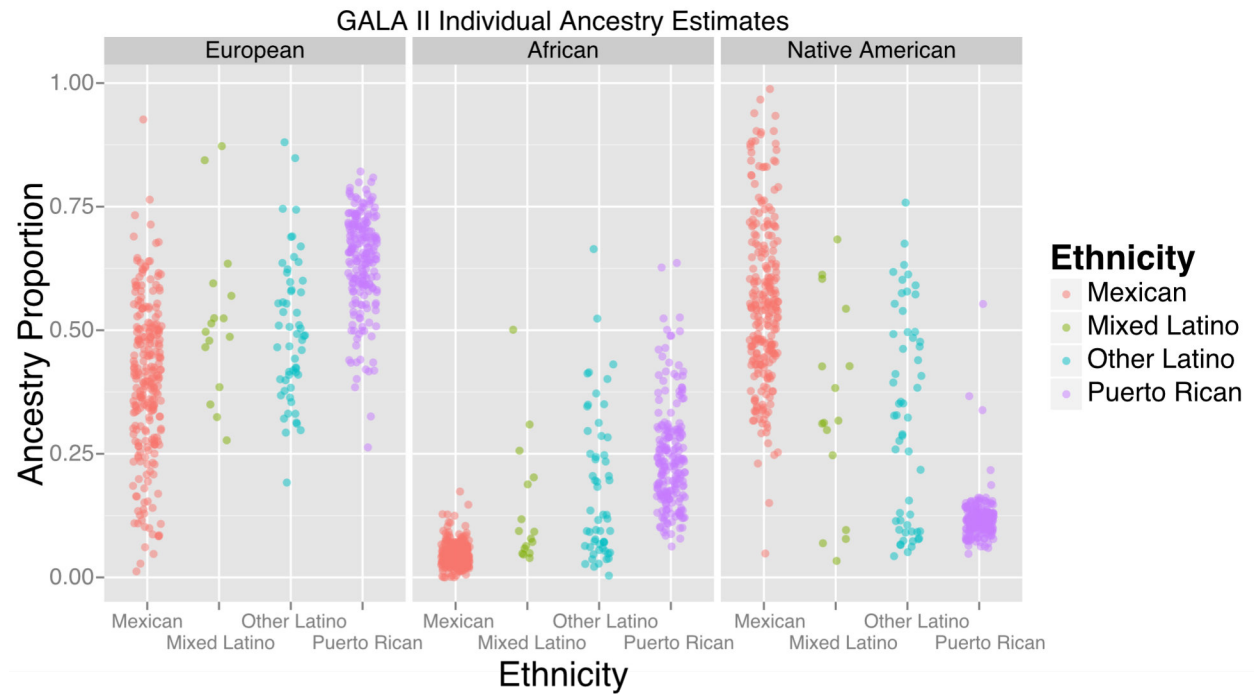





# Supplementary Figure 3

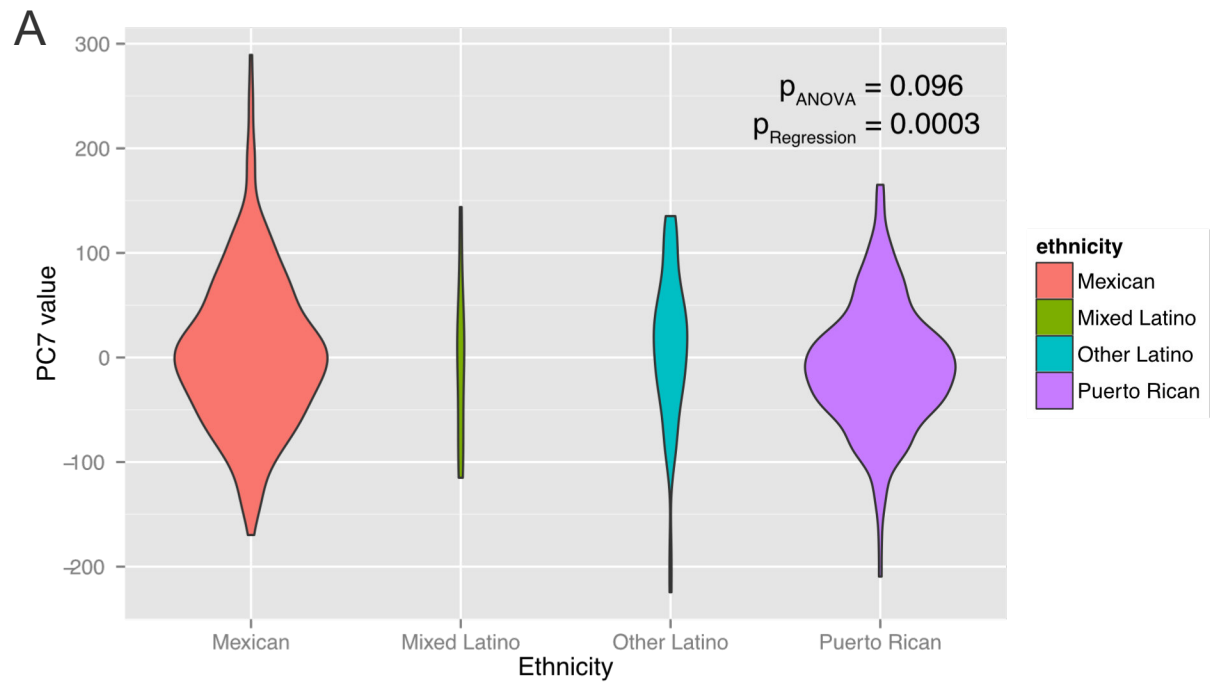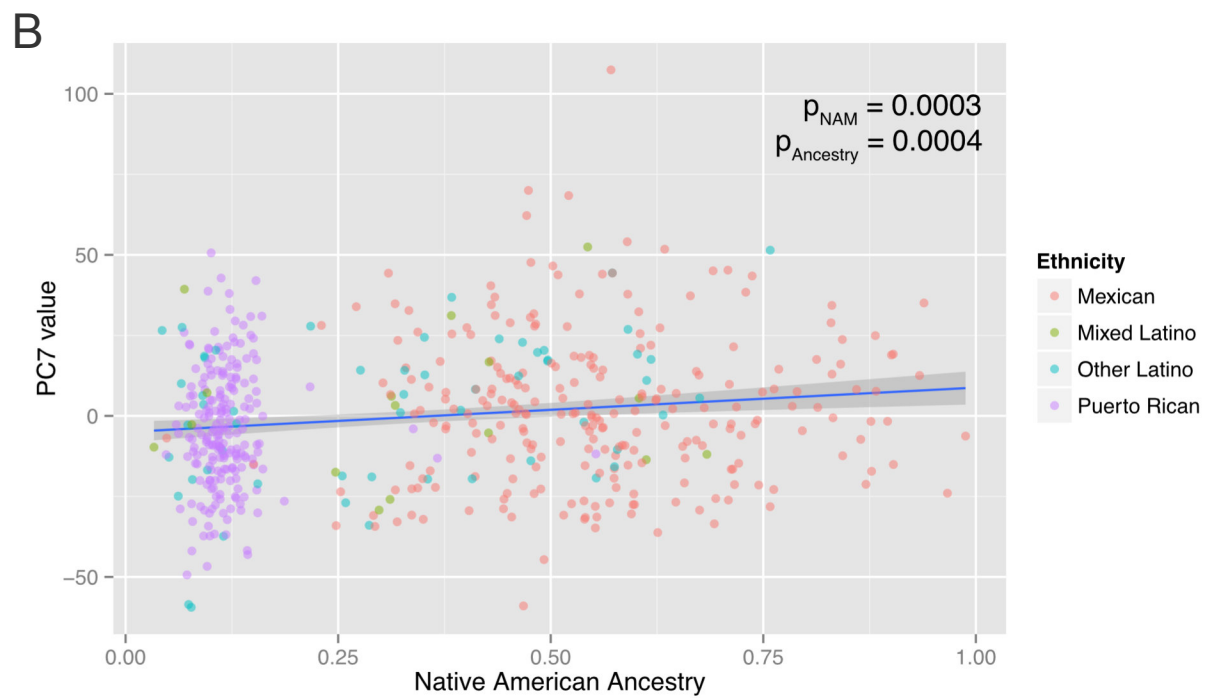

# Supplementary Figure 4 A

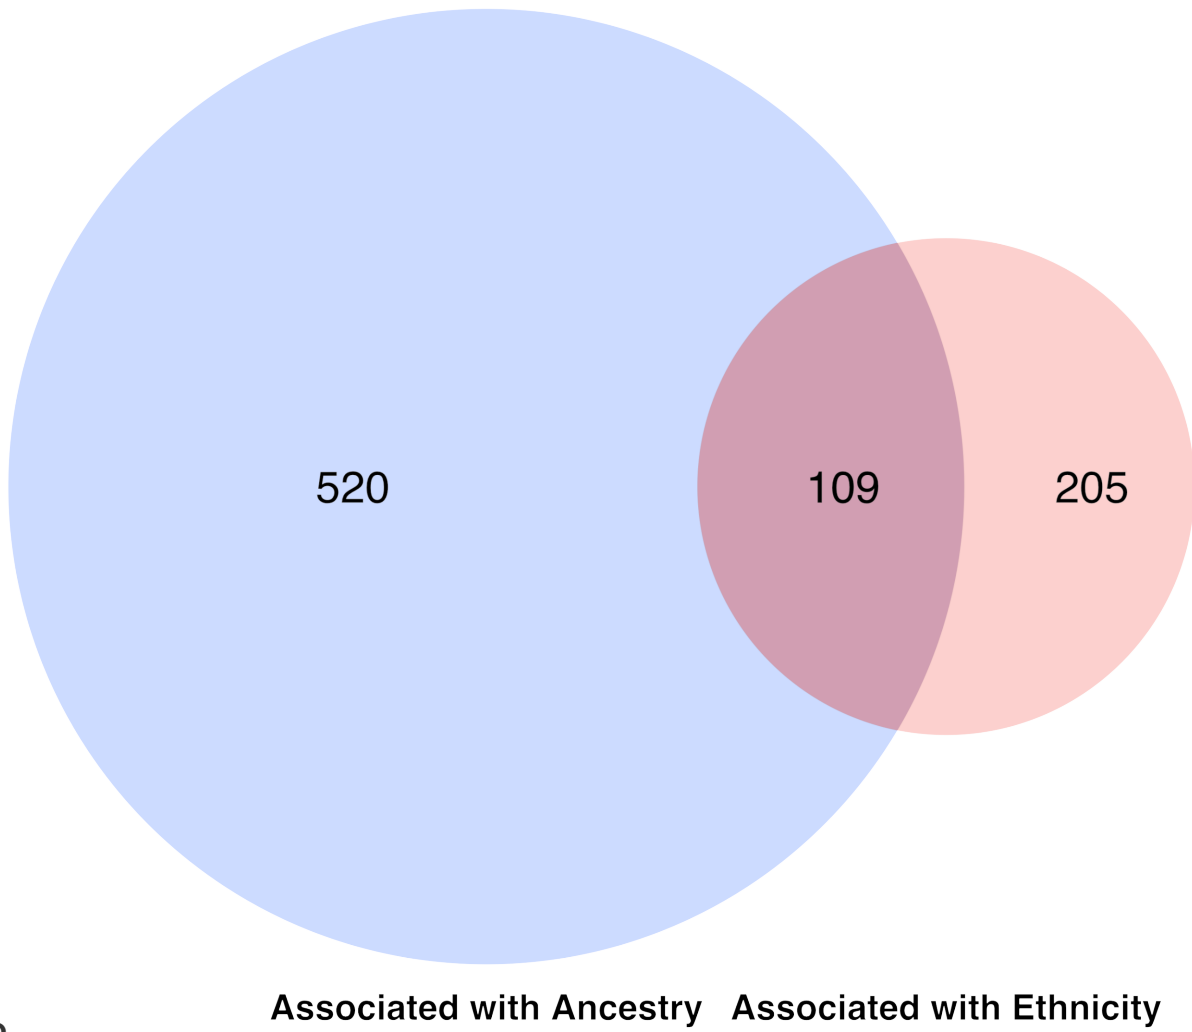

## B

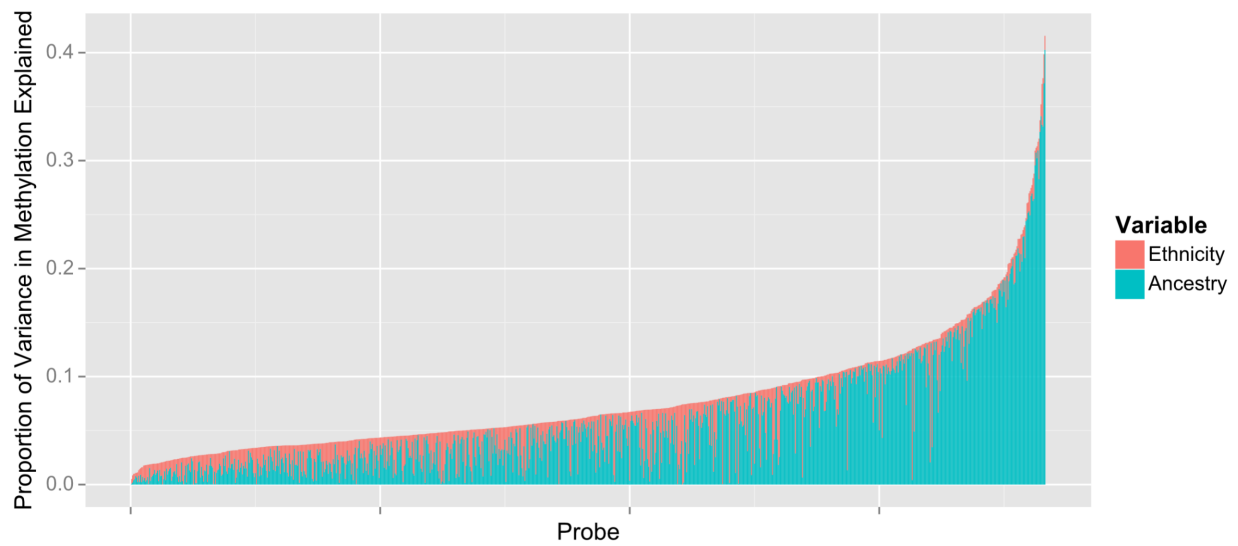

# Supplementary Figure 5

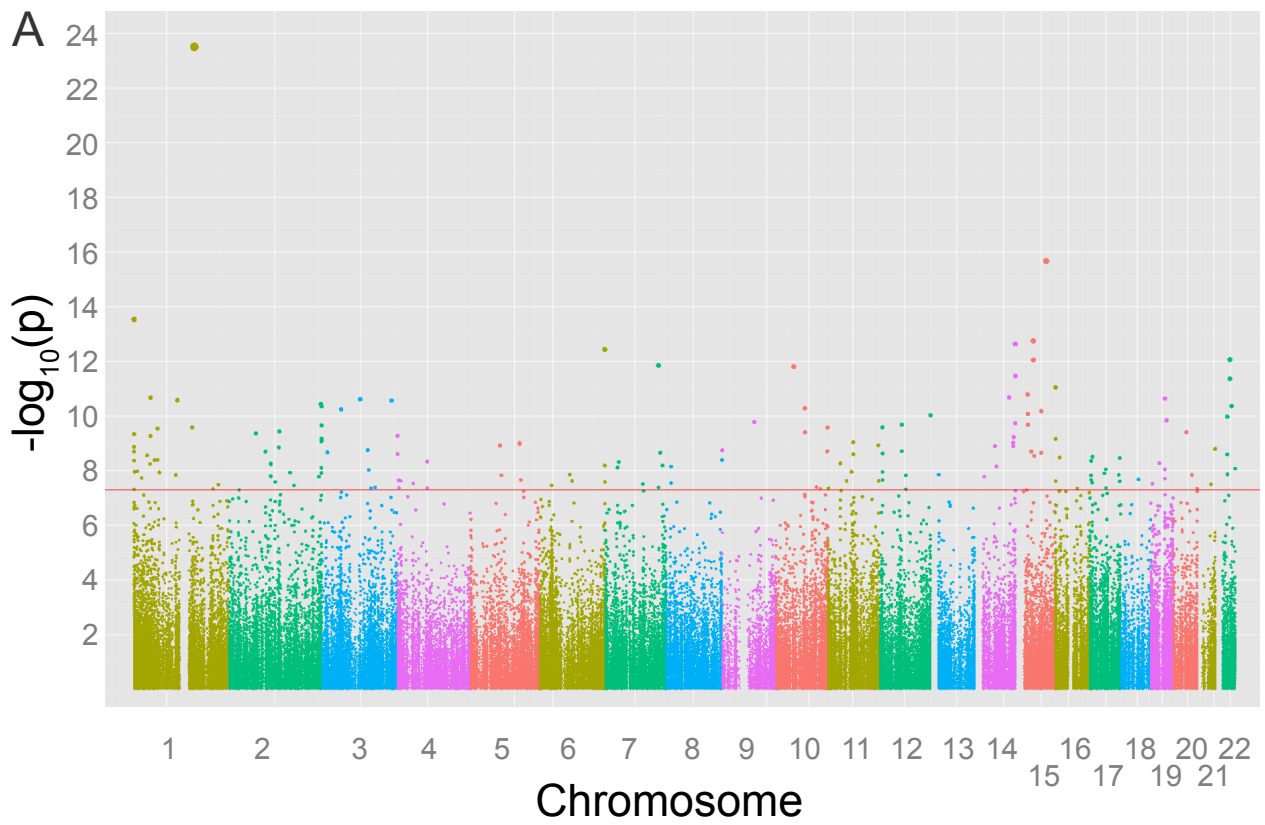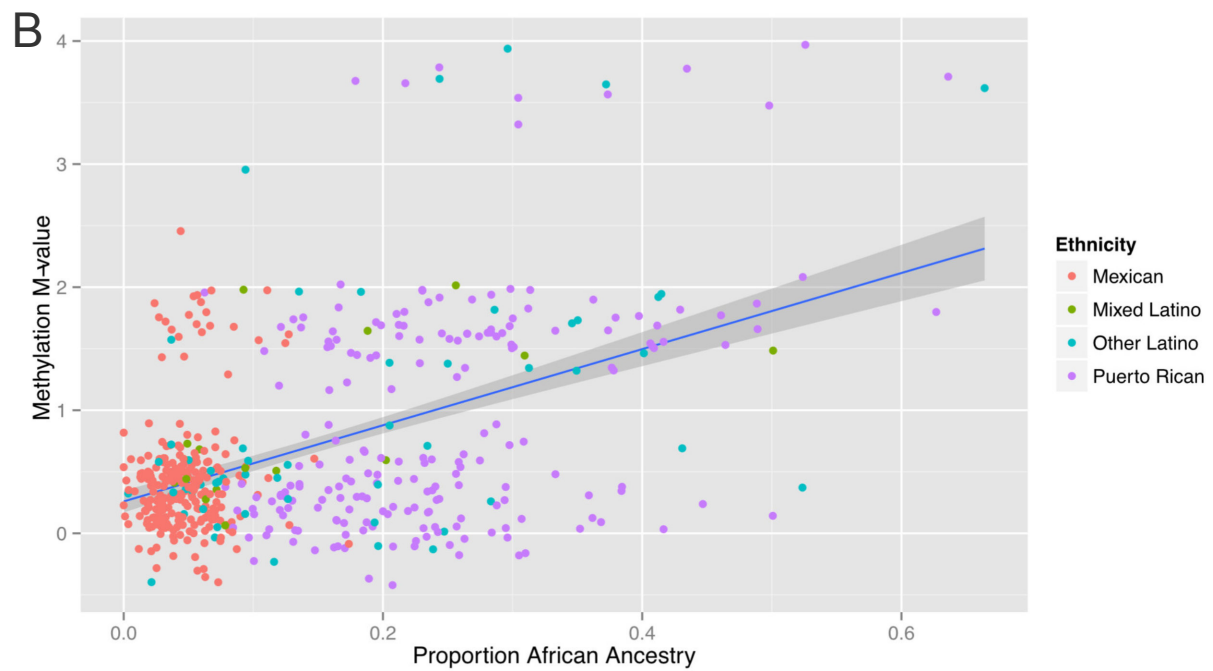

# Supplementary Figure 6

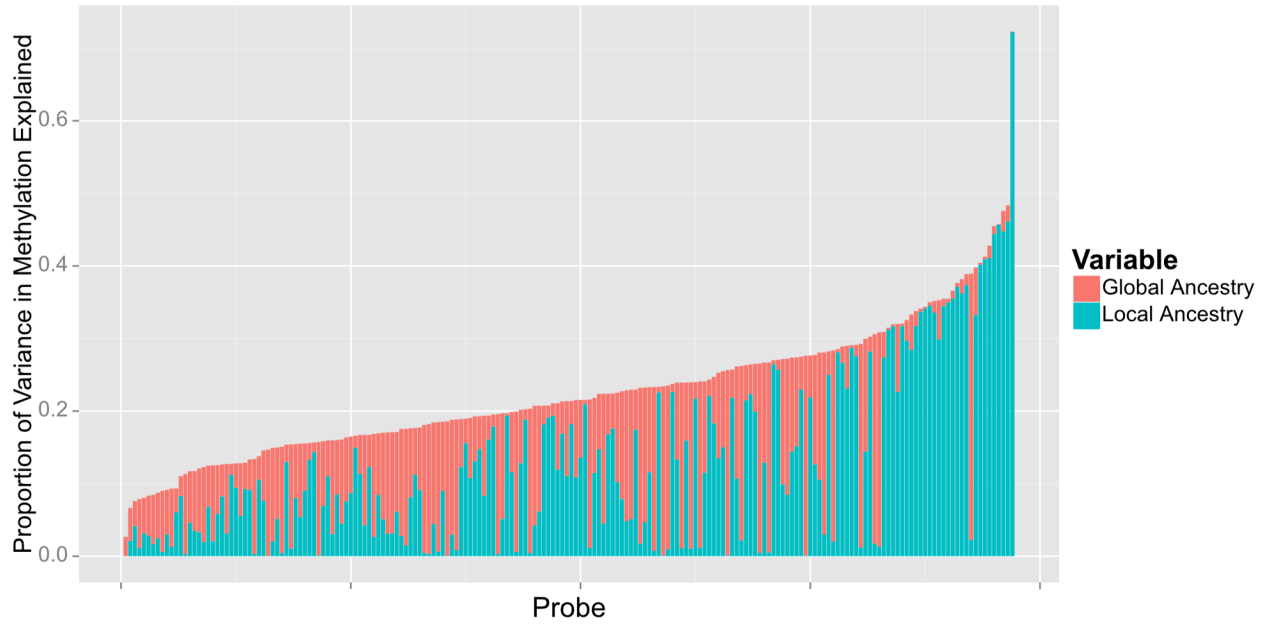

Supplement: Supplementary file [file 036822-1.pdf]
